# Supplementary material for: Junctional and allele-specific residues are critical for MERS-CoV neutralization by an exceptionally potent germline-like antibody
Source: Springer Nature journal article supplement (doi:10.1038/ncomms9223), 2015-09-15
Supplement: 41467_2015_BFncomms9223_MOESM1267_ESM.pdf [file 41467_2015_BFncomms9223_MOESM1267_ESM.pdf]

# Supplementary Figure 1

## a Electron density at the interface of m336 and MERS-CoV RBD

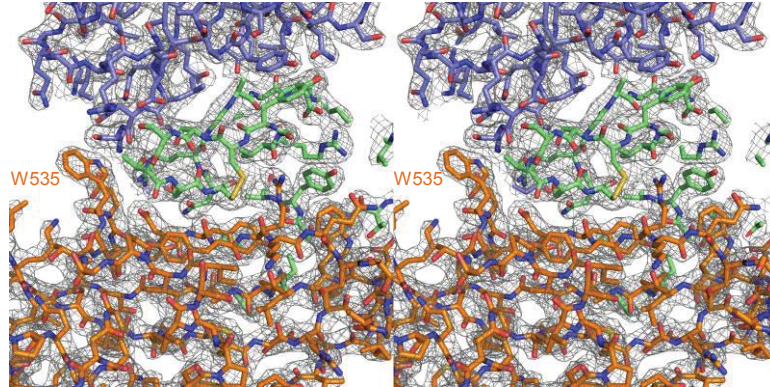

## b M336 epitope

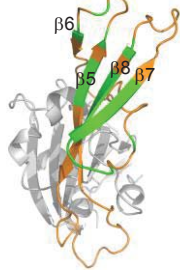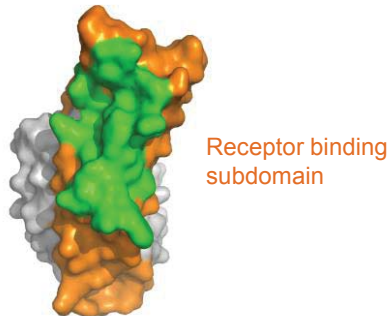

## c DPP4 contacts

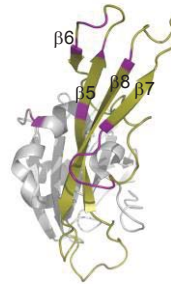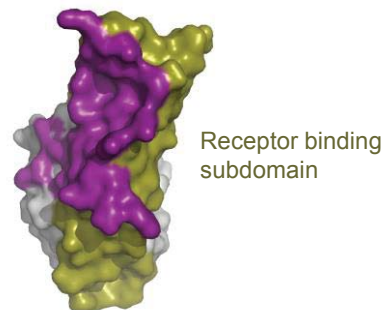

### Supplementary Figure 1. Representative electron density map and comparison of m336 epitope and DPP4 binding site on MERS-CoV RBD

(a) Stereo view of  $2F_o - F_c$  electron density at the interface of m336 and MERS-CoV RBD contoured at  $1.0 \sigma$  level. The MERS-CoV RBD, m336 heavy and light chains are shown with stick representation with C $\alpha$  atoms colored orange, light green and light blue, respectively. MERS-CoV RBD residue 535 is labeled for view orientation. (b and c) Side-by-side comparison of m336 epitope and DPP4 binding site on MERS-CoV RBD shown in both cartoon (top) and surface representation (bottom). The epitope of m336 (b) is colored in green and the binding site of DPP4 (c) is colored in purple on MERS-CoV RBD .

## Supplementary Figure 2

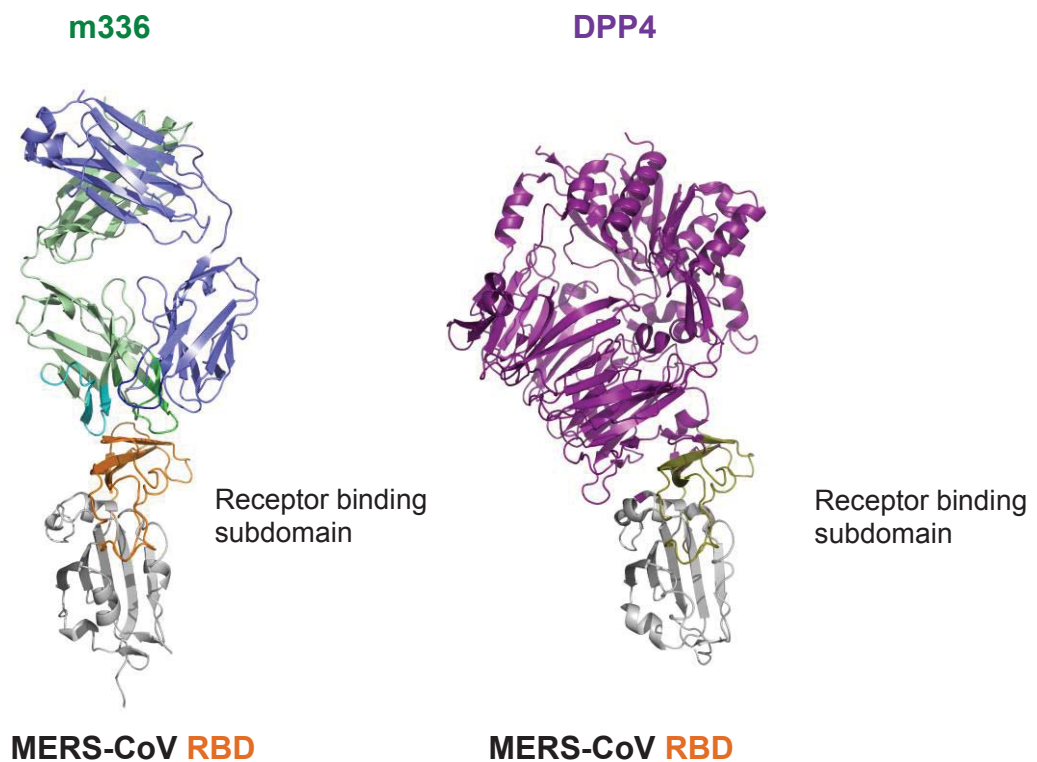

### Supplementary Figure 2. m336 mimics receptor DPP4 with similar angle of approach to engage MERS-CoV

The MERS-CoV RBD, m336 heavy and light chains as well as the receptor DPP4 are shown in cartoon representation with the same color scheme as in Figures 1 and 2.

# Supplementary Figure 3

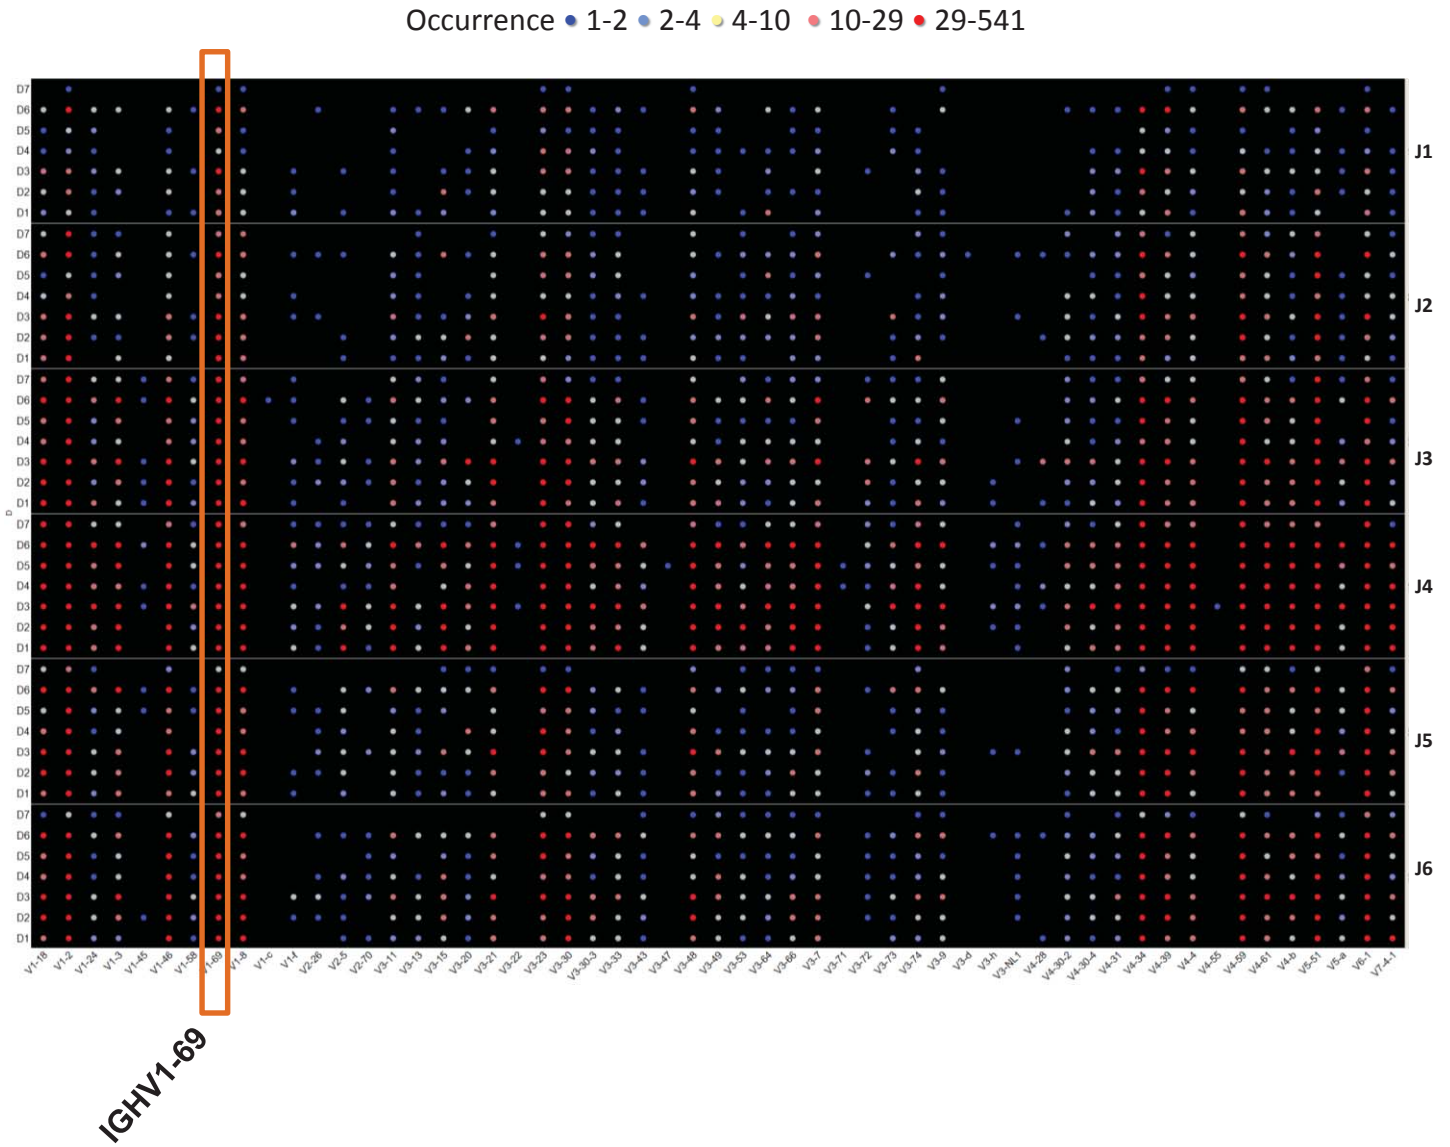

**Supplementary Figure 3. VDJ frequencies showing the productive VH rearrangements from different IGHV germline genes as quantified from the 454 sequencing analysis of IgM libraries derived from 69 healthy human subjects**  
The IGHV1-69 contributes significantly (12.7%) to the antibody repertoires, boxed in orange (out of the total of 74,393 VH sequences).

# Supplementary Figure 4

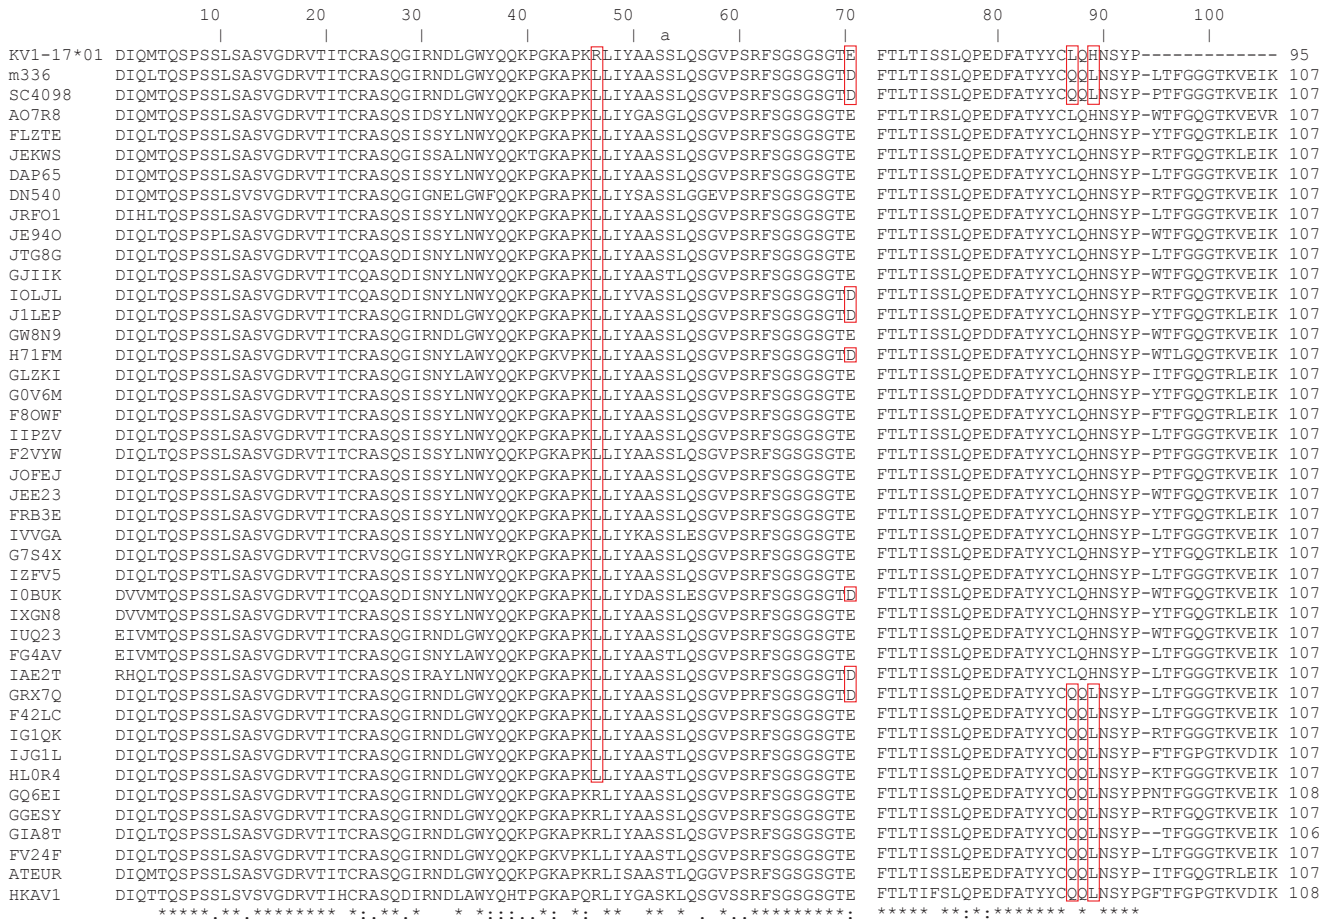

## Supplementary Figure 4. Multiple alignment of m336 V<sub>L</sub>-like sequences from naïve IgM libraries derived from 69 healthy human subjects and 2 newborn babies and an anti-rabies virus V<sub>L</sub> antibody sequence

Amino acid sequences of 40 V<sub>L</sub> antibody domains (denoted by 5-letter codes) that were found similar to that of m336 from 454 sequencing analysis of IgM libraries derived 69 adults and 2 babies., and a VL antibody chain from anti-rabies virus antibody (SC4098) from the report by Kramer *et al* Eur. J. Immunol. 2005. Red boxes show the pre-existing mutations in the IgM naïve repertoire as identical to that found in m336 V<sub>L</sub> suggesting a naturally germline-related m336 V<sub>L</sub>.

## Supplementary Figure 5

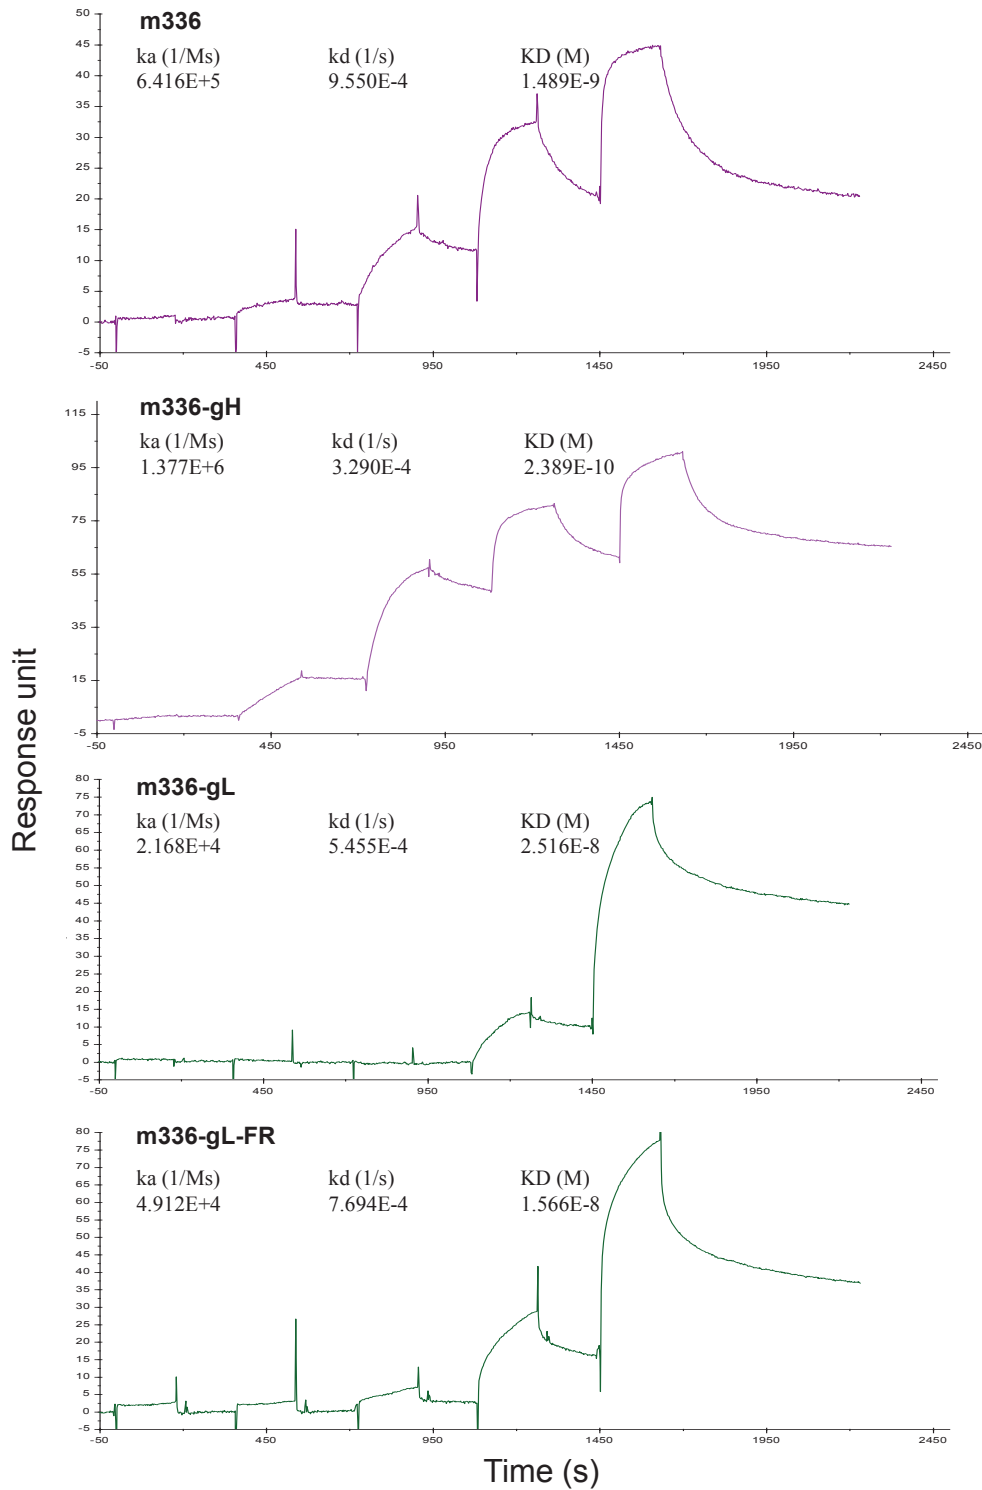

### Supplementary Figure 5. The binding kinetics of m336, m336-gH, m336-gL and m336-gL-FR to MERS-CoV S1

Single-cycle surface plasmon resonance analyses were carried out to assess binding of m336 variants to MERS-CoV S1. Antibody at five concentrations were injected incrementally in a single cycle onto a CM5 sensor chip immobilized with MERS-CoV S1 protein. The kinetic profiles are shown in each panel.

## Supplementary Figure 6

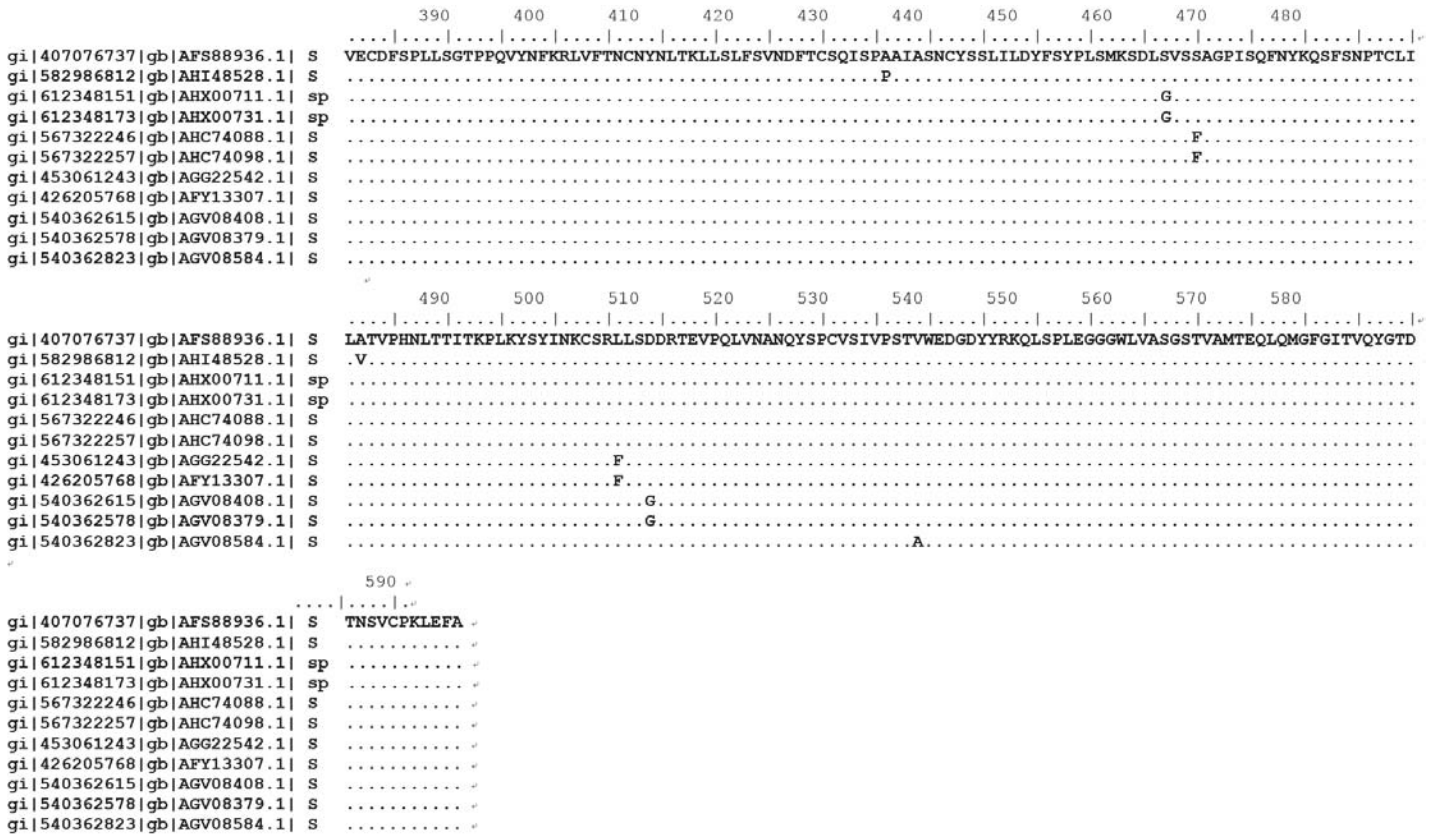

**Supplementary Figure 6. Multiple sequence alignment of known MERS-CoV RBD sequences with point mutations from clinical isolates was shown with the prototype EMC/2012 sequence (top)**

Isolates harboring the identified A431P, S457G, S460F, A482V, L506F, D509G, and V534A substitution are shown with conserved residues marked as dots.

**Supplementary Table 1. Contribution of different m336 regions to its MERS-CoV RBD binding interface**

|                    | <b>Heavy chain (Å<sup>2</sup>)</b> | <b>Light chain (Å<sup>2</sup>)</b> |
|--------------------|------------------------------------|------------------------------------|
| <b>Framework 1</b> | 0                                  | 0                                  |
| <b>CDR1*</b>       | 203 (23.6%)                        | 0                                  |
| <b>Framework 2</b> | 0                                  | 0                                  |
| <b>CDR2</b>        | 280 (32.6%)                        | 0                                  |
| <b>Framework 3</b> | 14 (1.7%)                          | 0                                  |
| <b>CDR3</b>        | 250 (29.1%)                        | 111 (12.9%)                        |
| <b>Total</b>       | 747 (87.1)                         | 111 (12.9%)                        |

\*: all complementarity determining regions (CDRs) were defined according to Kabat nomenclature.

**Supplementary Table 2. Hydrogen bonds and salt bridges between m336 and MERS-CoV RBD**

| <b>Hydrogen bonds</b> |                |                     |                     |                                   |
|-----------------------|----------------|---------------------|---------------------|-----------------------------------|
|                       | <b>m336</b>    | <b>Distance (Å)</b> | <b>MERS-CoV RBD</b> | <b>Conserved DPP4 interaction</b> |
| 1                     | H:SER30[OG]    | 3.08                | A:ASP510[OD2]       | Arg317                            |
| 2                     | H:ASN100d[ND2] | 3.43                | A:GLY538[O]         | Gln286                            |
| 3                     | H:ARG100e[NH1] | 2.75                | A:ASP539[OD1]       | Lys267                            |
| 4                     | H:ARG100e[NH2] | 2.98                | A:ASP539[OD2]       |                                   |
| 5                     | H:CYS100c[N]   | 2.70                | A:TYR540[O]         |                                   |
| 6                     | H:ASN100d[OD1] | 2.96                | A:TYR540[N]         |                                   |
| 7                     | H:SER31[O]     | 2.64                | A:TYR540[OH]        |                                   |
| 8                     | H:CYS100c[SG]  | 3.66                | A:ARG542[N]         |                                   |
| 9                     | H:SER31[O]     | 3.52                | A:ARG542[NE]        |                                   |
| 10                    | H:VAL99[O]     | 3.25                | A:ARG542[NH2]       |                                   |
| 11                    | H:SER30[OG]    | 3.74                | A:TRP553[NE1]       |                                   |
| 12                    | L:TYR94[N]     | 3.14                | A:GLU536[OE2]       |                                   |
| 13                    | L:SER93[OG]    | 2.80                | A:TRP535[NE1]       |                                   |

  

| <b>Salt bridges</b> |                |                     |                     |                                   |
|---------------------|----------------|---------------------|---------------------|-----------------------------------|
|                     | <b>m336</b>    | <b>Distance (Å)</b> | <b>MERS-CoV RBD</b> | <b>Conserved DPP4 interaction</b> |
| 1                   | H:ARG100e[NH1] | 2.75                | A:ASP539[OD1]       | Lys267                            |
| 2                   | H:ARG100e[NH2] | 2.98                | A:ASP539[OD2]       | Lys267                            |



### Supplementary Table 3. Analysis of the junction showing the mapping of IGHD with a high identity with possible N1/N2 addition along with 3'V- region and 5'J-region.

#### Analysis of the JUNCTION

D-REGION is in reading frame 2.

Click on mutated (underlined) nucleotide to see the original one:

| Input  | V name             | 3'V-REGION  | N1 | D-REGION                                | N2      | 5'J-REGION          | J name          | D name            | Vmut | Dmut | Jmut | Ngc |
|--------|--------------------|-------------|----|-----------------------------------------|---------|---------------------|-----------------|-------------------|------|------|------|-----|
| m336VH | Homsap IGHV1-69*06 | tgtgcgagag. | t  | tgga <u>tattgtagtagtaccagctgc</u> ..... | aaccgag | ...tgcttttgatatctgg | Homsap IGHJ3*02 | Homsap IGHD2-2*03 | 0    | 0    | 0    | 5/9 |

#### Translation of the JUNCTION

Click on mutated (underlined) amino acid to see the original one:

|        | 104 | 105 | 106      | 107 | 108 | 109 | 110 | 111 | 111.1 | 111.2 | 112.3 | 112.2 | 112.1    | 112      | 113 | 114 | 115 | 116 | 117 | 118 | Frame | CDR3-IMGT length | Molecular mass | pI   | PhysicoChemical Descriptor (by BRFAA) |
|--------|-----|-----|----------|-----|-----|-----|-----|-----|-------|-------|-------|-------|----------|----------|-----|-----|-----|-----|-----|-----|-------|------------------|----------------|------|---------------------------------------|
|        | C   | A   | <u>R</u> | V   | E   | Y   | C   | S   | S     | T     | S     | C     | <u>N</u> | <u>R</u> | G   | A   | F   | D   | I   | W   | +     | 18               | 2,196.48       | 7.87 | CARVGYCSSTSCNRGAFDIW                  |
| m336VH | tgt | gcg | aga      | ggt | gga | tat | tgt | agt | agt   | acc   | agc   | tgc   | aac      | cga      | ggt | gct | ttt | gat | atc | tgg | +     | 18               | 2,196.48       | 7.87 | CARVGYCSSTSCNRGAFDIW                  |

Be aware that some allele reference sequences may be incomplete or from cDNAs. In those cases, IMGT/JunctionAnalysis uses automatically the allele \*01 for the analysis of the JUNCTION.

#### Closest D-REGIONS

|                                            | Score | Identity          |
|--------------------------------------------|-------|-------------------|
| <a href="#">M35648</a> Homsap IGHD2-2*03 F | 118   | 89.66% (26/29 nt) |
| <a href="#">J00232</a> Homsap IGHD2-2*01 F | 109   | 86.21% (25/29 nt) |
| <a href="#">X97051</a> Homsap IGHD2-2*02 F | 109   | 86.21% (25/29 nt) |

#### Alignment

|                            |                                |
|----------------------------|--------------------------------|
| m336VH                     | ttggatattgtagtagtaccagctgcaacc |
| M35648 Homsap IGHD2-2*03 F | .-----t-tgcc                   |
| J00232 Homsap IGHD2-2*01 F | .a-----t-tgcc                  |
| X97051 Homsap IGHD2-2*02 F | .a-----t-tacc                  |
| IGHD2-2*03                 | <b>GYCSSTSC</b> YA             |

**Supplementary Table 4. Analysis of the nucleotide divergence of m336 heavy chain and light chain from its germline counterpart**

**Heavy chain:**

```

<----- FR1 - IMGT -----
1           5           10           15
  Q   V   Q   L   V   Q   S   G   A           E   V   K   K   P
m336VH     cag gtg cag ctg gtg cag tct ggg gct ... gag gtg aag aag cct

L22583 Homsap IGHV1-69*06 F     --- --- --- --- --- --- --- --- --- --- --- --- --- ---

----->
           20           25           30
  G   S   S   V   K   V   S   C   K   A   S   G   G   T   F
m336VH     ggg tcc tcg gtg aag gtc tcc tgc aag gct tct gga ggc acc ttc

L22583 Homsap IGHV1-69*06 F     --- --- --- --- --- --- --- --- --- --- --- --- --- ---

___ CDR1 - IMGT _____ <-----
           35           40           45
           S   S   Y   A   I   S   W   V   R   Q   A
m336VH     ... .. agc agc tat gct atc agc tgg gtg cga cag gcc

L22583 Homsap IGHV1-69*06 F     ... .. --- --- --- --- --- --- --- --- --- ---

FR2 - IMGT -----> _____ CDR2
           50           55           60
  P   G   Q   G   L   E   W   M   G   G   I   I   P   I
m336VH     cct gga caa ggg ctt gag tgg atg gga ggg atc atc cct atc ...

L22583 Homsap IGHV1-69*06 F     --- --- --- --- --- --- --- --- --- --- ...

- IMGT _____ <-----
           65           70           75
           F   G   T   A   S   Y   A   Q   K   F   Q           G   R
m336VH     ... ttt ggt aca gca agc tac gca cag aag ttc cag ... ggc aga
           N
L22583 Homsap IGHV1-69*06 F     ... --- --- --- --- -a- --- --- --- --- --- ---

----- FR3 - IMGT -----
           80           85           90
  V   T   I   T   A   D   K   S   T   S   T   A   Y   M   E
m336VH     gtc acg att acc gcg gac aaa tcc acg agc aca gcc tac atg gag

L22583 Homsap IGHV1-69*06 F     --- --- --- --- --- --- --- --- --- --- --- ---

-----> _____
           95           100           104
  L   S   S   L   R   S   E   D   T   A   V   Y   Y   C   A
m336VH     ctg agc agc ctg aga tct gag gac acg gcc gtg tat tac tgt gcg

L22583 Homsap IGHV1-69*06 F     --- --- --- --- --- --- --- --- --- --- --- ---

_____ CDR3 - IMGT _____
  R   V   G   Y   C   S   S   T   S   C   N   R   G   A   F
m336VH     aga gtt gga tat tgt agt agt acc agc tgc aac cga ggt gct ttt

```

L22583 Homsap IGHV1-69\*06 F

--- -a

m336VH

D I W G Q G T M V T V S S  
 gat atc tgg ggc caa ggg aca atg gtc acc gtc tct tca

L22583 Homsap IGHV1-69\*06 F

**Nucleotide (nt) mutations**

| IMGT labels                              |           | V-REGION  | FR1-IMGT | CDR1-IMGT | FR2-IMGT | CDR2-IMGT | FR3-IMGT | CDR3-IMGT |
|------------------------------------------|-----------|-----------|----------|-----------|----------|-----------|----------|-----------|
| Nb of positions including IMGT gaps (nt) |           | 319 (320) | 78       | 36        | 51       | 30        | 117      | 7 (8)     |
| Nb of nucleotides                        |           | 295 (296) | 75       | 24        | 51       | 24        | 114      | 7 (8)     |
| Nb of identical nucleotides              |           | 294       | 75       | 24        | 51       | 24        | 113      | 7         |
| Nb of mutations                          |           | 1 (2)     | 0        | 0         | 0        | 0         | 1        | 0 (1)     |
| Mutations                                | Silent    | 0 (1)     | 0        | 0         | 0        | 0         | 0        | 0 (1)     |
|                                          | Nonsilent | 1         | 0        | 0         | 0        | 0         | 1        | 0         |
| Transitions                              | a>g       | 1         | 0        | 0         | 0        | 0         | 1        | 0         |
|                                          | g>a       | 0         | 0        | 0         | 0        | 0         | 0        | 0         |
|                                          | c>t       | 0         | 0        | 0         | 0        | 0         | 0        | 0         |
|                                          | t>c       | 0         | 0        | 0         | 0        | 0         | 0        | 0         |
| Transversions                            | a>c       | 0         | 0        | 0         | 0        | 0         | 0        | 0         |
|                                          | c>a       | 0         | 0        | 0         | 0        | 0         | 0        | 0         |
|                                          | a>t       | 0 (1)     | 0        | 0         | 0        | 0         | 0        | 0 (1)     |
|                                          | t>a       | 0         | 0        | 0         | 0        | 0         | 0        | 0         |
|                                          | g>c       | 0         | 0        | 0         | 0        | 0         | 0        | 0         |
|                                          | c>g       | 0         | 0        | 0         | 0        | 0         | 0        | 0         |
|                                          | g>t       | 0         | 0        | 0         | 0        | 0         | 0        | 0         |
| t>g                                      | 0         | 0         | 0        | 0         | 0        | 0         | 0        |           |

**Amino acid (AA) changes**

| IMGT labels                              |              | V-REGION | FR1-IMGT | CDR1-IMGT | FR2-IMGT | CDR2-IMGT | FR3-IMGT | CDR3-IMGT |
|------------------------------------------|--------------|----------|----------|-----------|----------|-----------|----------|-----------|
| Nb of positions including IMGT gaps (AA) |              | 106      | 26       | 12        | 17       | 10        | 39       | 2         |
| Nb of AA                                 |              | 98       | 25       | 8         | 17       | 8         | 38       | 2         |
| Nb of identical AA                       |              | 97       | 25       | 8         | 17       | 8         | 37       | 2         |
| Nb of AA changes                         |              | 1        | 0        | 0         | 0        | 0         | 1        | 0         |
| AA changes                               | Very similar | (+++)    | 0        | 0         | 0        | 0         | 0        | 0         |
|                                          | Similar      | (++-)    | 0        | 0         | 0        | 0         | 0        | 0         |
|                                          |              | (+-+)    | 0        | 0         | 0        | 0         | 0        | 0         |
|                                          | Dissimilar   | (+--)    | 0        | 0         | 0        | 0         | 0        | 0         |
|                                          |              | (-+-)    | 0        | 0         | 0        | 0         | 0        | 0         |
|                                          |              | (--+)    | 0        | 0         | 0        | 0         | 0        | 0         |
| Very dissimilar                          | (---)        | 1        | 0        | 0         | 0        | 0         | 1        |           |

**Light chain:**

```

<----- FR1 - IMGT -----
1             5             10             15
m336VL       gac atc cag ttg acc cag tct cca tcc tcc ctg tct gca tct gta
X72808 Homsap IGKV1-17*01 F   --- --- --- a-- --- --- --- --- --- --- --- ---
D88255 Homsap IGKV1-17*02 F   --- --- --- a-- --- --- --- --- --- --- --- ---
M64858 Homsap IGKV1-6*01 F   -c- --- --- a-- --- --- --- --- --- --- --- ---
KM455558 Homsap IGKV1-6*02 F  -c- --- --- a-- --- --- --- --- --- --- --- -t
Z00006 Homsap IGKV1-13*02 F  -c- --- --- --- --- --- --- --- --- --- ---

```

```

----->
                20             25             30
m336VL       gga gac aga gtc acc atc act tgc cgg gca agt cag ggc att ...
X72808 Homsap IGKV1-17*01 F   --- --- --- --- --- --- --- --- --- ---
D88255 Homsap IGKV1-17*02 F   --- --- --- --- --- --- --- --- --- ---
M64858 Homsap IGKV1-6*01 F   --- --- --- --- --- --- --- --- --- ---
KM455558 Homsap IGKV1-6*02 F  --- --- --- --- --- --- --- --- --- ---
Z00006 Homsap IGKV1-13*02 F  --- --- --- --- --- --- --- --- --- ---

```

```

___ CDR1 - IMGT _____ <-----
                35             40             45
m336VL       ... .. . . . . . . . . . . . . . . . . . . . . . . . .
X72808 Homsap IGKV1-17*01 F   ... .. . . . . . . . . . . . . . . . . . . . . . . . .
D88255 Homsap IGKV1-17*02 F   ... .. . . . . . . . . . . . . . . . . . . . . . . . .
M64858 Homsap IGKV1-6*01 F   ... .. . . . . . . . . . . . . . . . . . . . . . . . .
KM455558 Homsap IGKV1-6*02 F  ... .. . . . . . . . . . . . . . . . . . . . . . . . .
Z00006 Homsap IGKV1-13*02 F   ... .. . . . . . . . . . . . . . . . . . . . . . . . .

```

```

FR2 - IMGT -----> _____ CDR2
                50             55             60
m336VL       cca ggg aaa gcc cct aag ctc ctg atc tat gct gca ... .. .
X72808 Homsap IGKV1-17*01 F   --- --- --- --- -g- --- --- --- --- --- ... .. .
D88255 Homsap IGKV1-17*02 F   --- --- --- --- -g- --- --- --- --- --- ... .. .
M64858 Homsap IGKV1-6*01 F   --- --- --- --- --- --- --- --- --- --- --- ... .. .
KM455558 Homsap IGKV1-6*02 F  --- --- --- --- --- --- --- --- --- --- --- ... .. .
Z00006 Homsap IGKV1-13*02 F   --- --- --- -t --- --- --- --- --- -a- -c ... .. .

```

```

- IMGT _____ <-----
                65             70             75
m336VL       ... .. . . . . . . . . . . . . . . . . . . . . . . . .
X72808 Homsap IGKV1-17*01 F   ... .. . . . . . . . . . . . . . . . . . . . . . . . .
D88255 Homsap IGKV1-17*02 F   ... .. . . . . . . . . . . . . . . . . . . . . . . . .
M64858 Homsap IGKV1-6*01 F   ... .. . . . . . . . . . . . . . . . . . . . . . . . .
KM455558 Homsap IGKV1-6*02 F  ... .. . . . . . . . . . . . . . . . . . . . . . . . .
Z00006 Homsap IGKV1-13*02 F   ... .. . . . . . . . . . . . . . . . . . . . . . . . .

```

```

----- FR3 - IMGT -----
                80             85             90
m336VL       ttc agc ggc agt gga ... .. . . . . . . . . . . . . . . . . .
X72808 Homsap IGKV1-17*01 F   --- --- --- --- --- --- --- -g- --- -a- --- --- --- -a
D88255 Homsap IGKV1-17*02 F   --- --- --- --- --- --- --- -g- --- -a- --- --- --- -a
M64858 Homsap IGKV1-6*01 F   --- --- --- --- --- --- --- --- --- --- --- --- --- ---
KM455558 Homsap IGKV1-6*02 F  --- --- --- --- --- --- --- --- --- --- --- --- --- ---
Z00006 Homsap IGKV1-13*02 F   --- --- --- --- --- --- --- -g- --- --- --- --- --- ---

```

```

-----> _____
                95             100             104
m336VL       atc agc agc ctg cag cct gaa gat ttt gca act tat tac tgt caa
X72808 Homsap IGKV1-17*01 F   --- --- --- --- --- --- --- --- --- --- --- --- --- -t-

```

D88255 Homsap IGKV1-17\*02 F --- -a- --- --- --- --- --- --- --- -t-  
M64858 Homsap IGKV1-6\*01 F --- --- --- --- --- --- --- --- --- -t-  
KM455558 Homsap IGKV1-6\*02 F --- --- --- --- --- --- --- --- --- -t-  
Z00006 Homsap IGKV1-13\*02 F --- --- --- --- --- --- --- --- ---

\_\_\_\_\_ CDR3 - IMGT \_\_\_\_\_

m336VL cag ctt aat agt tac ccg ctc act ttc ggc gga ggg acc aaa gtg  
X72808 Homsap IGKV1-17\*01 F --- -a- --- --- --- -t -c  
D88255 Homsap IGKV1-17\*02 F --- -a- --- --- --- -t -c  
M64858 Homsap IGKV1-6\*01 F --a ga- t-c -a- --- -t -c  
KM455558 Homsap IGKV1-6\*02 F --a ga- t-c -a- --- -t -c  
Z00006 Homsap IGKV1-13\*02 F --- t-- --- --- --- -t -a

**Nucleotide (nt) mutations**

| IMGT labels                              |           | V-REGION  | FR1-IMGT | CDR1-IMGT | FR2-IMGT | CDR2-IMGT | FR3-IMGT | CDR3-IMGT |
|------------------------------------------|-----------|-----------|----------|-----------|----------|-----------|----------|-----------|
| Nb of positions including IMGT gaps (nt) |           | 332 (335) | 78       | 36        | 51       | 30        | 117      | 20 (23)   |
| Nb of nucleotides                        |           | 284 (287) | 78       | 18        | 51       | 9         | 108      | 20 (23)   |
| Nb of identical nucleotides              |           | 276 (277) | 77       | 18        | 50       | 9         | 104      | 18 (19)   |
| Nb of mutations                          |           | 8 (10)    | 1        | 0         | 1        | 0         | 4        | 2 (4)     |
| Mutations                                | Silent    | 3 (5)     | 0        | 0         | 0        | 0         | 3        | 0 (2)     |
|                                          | Nonsilent | 5         | 1        | 0         | 1        | 0         | 1        | 2         |
| Transitions                              | a>g       | 0         | 0        | 0         | 0        | 0         | 0        | 0         |
|                                          | g>a       | 1         | 0        | 0         | 0        | 0         | 1        | 0         |
|                                          | c>t       | 0 (1)     | 0        | 0         | 0        | 0         | 0        | 0 (1)     |
|                                          | t>c       | 0         | 0        | 0         | 0        | 0         | 0        | 0         |
| Transversions                            | a>c       | 1         | 0        | 0         | 0        | 0         | 1        | 0         |
|                                          | c>a       | 0         | 0        | 0         | 0        | 0         | 0        | 0         |
|                                          | a>t       | 3         | 1        | 0         | 0        | 0         | 1        | 1         |
|                                          | t>a       | 1         | 0        | 0         | 0        | 0         | 0        | 1         |
|                                          | g>c       | 1         | 0        | 0         | 0        | 0         | 1        | 0         |
|                                          | c>g       | 0         | 0        | 0         | 0        | 0         | 0        | 0         |
|                                          | g>t       | 1         | 0        | 0         | 1        | 0         | 0        | 0         |
|                                          | t>g       | 0 (1)     | 0        | 0         | 0        | 0         | 0        | 0 (1)     |

**Amino acid (AA) changes**

| IMGT labels                              |                 | V-REGION  | FR1-IMGT | CDR1-IMGT | FR2-IMGT | CDR2-IMGT | FR3-IMGT | CDR3-IMGT |
|------------------------------------------|-----------------|-----------|----------|-----------|----------|-----------|----------|-----------|
| Nb of positions including IMGT gaps (AA) |                 | 110 (111) | 26       | 12        | 17       | 10        | 39       | 6 (7)     |
| Nb of AA                                 |                 | 94 (95)   | 26       | 6         | 17       | 3         | 36       | 6 (7)     |
| Nb of identical AA                       |                 | 89 (90)   | 25       | 6         | 16       | 3         | 35       | 4 (5)     |
| Nb of AA changes                         |                 | 5         | 1        | 0         | 1        | 0         | 1        | 2         |
| AA changes                               | Very similar    | (+++)     | 0        | 0         | 0        | 0         | 0        | 0         |
|                                          | Similar         | (++-)     | 1        | 1         | 0        | 0         | 0        | 0         |
|                                          |                 | (+-+)     | 1        | 0         | 0        | 0         | 0        | 1         |
|                                          | Dissimilar      | (+--)     | 0        | 0         | 0        | 0         | 0        | 0         |
|                                          |                 | (-+-)     | 1        | 0         | 0        | 1         | 0        | 0         |
|                                          |                 | (--+)     | 0        | 0         | 0        | 0         | 0        | 0         |
|                                          | Very dissimilar | (---)     | 2        | 0         | 0        | 0         | 0        | 2         |
